# Supplementary material
Source: PubMed Central journal article supplement (PMC9516357)
Supplement: mmc1.pdf [file mmc1.pdf]

# **Electron Beam Technology for Re-processing of Personal Protective Equipment**

Min Huang<sup>a</sup>, Md Kamrul Hasan<sup>a</sup>, Suresh D. Pillai<sup>b</sup>, Matt Pharr<sup>a</sup>, David Staack<sup>a</sup>

*<sup>a</sup>Department of Mechanical Engineering, Texas A&M University, 3123 Spence St, College Station, TX 77840, USA*

*<sup>b</sup>National Center for Electron Beam Research, Texas A&M University, College Station, TX 77840, USA*

[\\*dstaack@tamu.edu](mailto:*dstaack@tamu.edu)

## **Paper Abstract:**

Beginning with the outbreak of COVID-19 at the dawn of 2020, the continuing spread of the pandemic has challenged the healthcare market and the supply chain of Personal Protective Equipment (PPE) around the world. Moreover, the emergence of the variants of COVID-19 occurring in waves threatens the sufficient supply of PPE. Among the various types of PPE, N95 Respirators, surgical masks, and medical gowns are the most consumed and thus have a high potential for a serious shortage during such emergencies. Considering the unanticipated demand for PPE during a pandemic, re-processing of used PPE is one approach to continue to protect the health of first responders and healthcare personnel. This paper evaluates the viability and efficacy of using FDA-approved electron beam (eBeam) sterilization technology (ISO 11137) to re-process used PPE. PPEs including 3M N95 Respirators, Proxima Sirius gowns, and face shields were eBeam irradiated in different media (air, argon) over a dose range of 0-200 kGy. Several tests were then performed to examine surface properties, mechanical properties, functionality performance, discoloration phenomenon, and liquid barrier performance. The results show a reduction of filtration efficiency to about 63.6% in the N95 Respirator; however, charge regeneration may improve the re-processed efficiency. Additionally, mechanical degradation was observed in Proxima Sirius gown with increasing dose up to 100 kGy. However, no mechanical degradation was observed in the face shields after 10 times donning and doffing. Apart from the face shield, N95 Respirators and Proxima Sirius gown both show significant mechanical degradation with dose over sterilization doses (>25 kGy), indicating that eBeam technology is not appropriate for the re-processing these PPEs.

**Keywords:** N95 Respirator, Medical Gown, Face Shield, Electron Beam, Reprocessing, Personal Protective Equipment

S-Table 1. Replicates number for each material characterization method

|                  | Strap Tensile Testing | Particulate Filtration Testing | Surface Wettability Testing | Yellowness Index | Hydrostatic Testing | Water Impact Penetration | Surface Morphology Testing | Mechanical Testing |
|------------------|-----------------------|--------------------------------|-----------------------------|------------------|---------------------|--------------------------|----------------------------|--------------------|
| Replicate Number | 1                     | 1                              | 3/6                         | 2                | 3                   | 1                        | 1                          | 3/4                |

S-Table 2. Surface Wettability Testing for 3M N95 Respirator Filter

| Surface Wettability/Water Contact Angle [°] |           |                 |                     |                    |          |                 |                     |                    |
|---------------------------------------------|-----------|-----------------|---------------------|--------------------|----------|-----------------|---------------------|--------------------|
|                                             | Frontside |                 |                     |                    | Backside |                 |                     |                    |
| Condition (ppm-min)                         | Control   | Open air-25 kGy | Sealed argon-25 kGy | Sealed air-100 kGy | Control  | Open air-25 kGy | Sealed argon-25 kGy | Sealed air-100 kGy |
| Sample#                                     |           |                 |                     |                    |          |                 |                     |                    |
| 1                                           | 134.7     | 138.9           | 135.8               | 134.5              | 143.7    | 145.4           | 143.6               | 142.6              |
| 2                                           | 137.4     | 139.7           | 132.9               | 133.1              | 140.5    | 146.0           | 144.2               | 142.7              |
| 3                                           | 136.0     | 139.0           | 130.4               | 131.3              | 138.9    | 145.6           | 145.7               | 143.1              |
| 4                                           | 137.5     | 133.1           | 134.9               | 132.7              | 140.8    | 145.4           | 142.1               | 140.5              |
| 5                                           | 133.1     | 135.3           | 133.6               | 131.0              | 142.5    | 146.1           | 147.5               | 142.8              |
| 6                                           | 133.1     | 140.0           | 132.3               | 136.3              | 143.8    | 146.8           | 144.0               | 142.6              |

S-Table 3. Surface Wettability Testing for Proxima Gown

| Surface Wettability/Water Contact Angle [°] |           |        |        |        |         |         |          |       |       |        |         |         |
|---------------------------------------------|-----------|--------|--------|--------|---------|---------|----------|-------|-------|--------|---------|---------|
|                                             | Frontside |        |        |        |         |         | Backside |       |       |        |         |         |
| Condition (ppm-min)                         | Control   | 25 kGy | 50 kGy | 75 kGy | 100 kGy | 200 kGy | Control  | 1800  | 3700  | 75 kGy | 100 kGy | 200 kGy |
| Sample#                                     |           |        |        |        |         |         |          |       |       |        |         |         |
| 1                                           | 144.5     | 141.2  | 137.9  | 151.5  | 134.6   | 144.6   | 130.8    | 134.1 | 134.0 | 131.0  | 141.9   | 140.2   |
| 2                                           | 137.5     | 148.6  | 146.9  | 141.7  | 144.8   | 141.8   | 137.2    | 135.1 | 144.2 | 132.0  | 133.3   | 132.6   |
| 3                                           | 138.4     | 147.8  | 134.9  | 133.8  | 138.7   | 140.7   | 139.9    | 135.2 | 130.7 | 138.6  | 138.7   | 135.0   |
| 4                                           | 136.2     | 141.2  | 142.9  | 140.7  | 141.3   | 140.2   | 134.7    | 130.0 | 139.8 | 133.1  | 140.2   | 136.9   |
| 5                                           | 150.2     | 140.9  | 145.7  | 146.7  | 138.0   | 143.9   | 142.0    | 141.0 | 137.3 | N/A    | 132.7   | 133.2   |
| 6                                           | 145.0     | 140.9  | 145.7  | 143.3  | 142.9   | 139.3   | 137.8    | 142.0 | 132.1 | 139.2  | 137.4   | 136.7   |

S-Table 4. Surface Wettability Testing for Proxima Gown (frontside) with 3 sec, 60 sec, and 180 sec delayed measurements.

| Surface Wettability/Water Contact Angle [°] |                 |       |       |         |       |       |
|---------------------------------------------|-----------------|-------|-------|---------|-------|-------|
|                                             | Control – 0 kGy |       |       | 200 kGy |       |       |
| Condition (ppm-min)                         | 3 s             | 60 s  | 180 s | 3 s     | 60 s  | 180 s |
| Sample#                                     |                 |       |       |         |       |       |
| 1                                           | 140.0           | 145.9 | 144.5 | 135.5   | 138.9 | 133.2 |

|   |       |       |       |       |       |       |
|---|-------|-------|-------|-------|-------|-------|
| 2 | 139.3 | 144.9 | 143.2 | 134.9 | 137.5 | 134.1 |
| 3 | 145.0 | 145.7 | 147.8 | 131.1 | 133.5 | 131.7 |

S-Table 5. Yellowness Index Testing for 3M N95 Respirator Filter

| Yellowness Index – 3M N95 Respirator Filter |         |                 |                     |                    |         |                 |                     |                    |
|---------------------------------------------|---------|-----------------|---------------------|--------------------|---------|-----------------|---------------------|--------------------|
| Condition (ppm-min)                         | Inside  |                 |                     |                    | Outside |                 |                     |                    |
|                                             | Control | Open air-25 kGy | Sealed argon-25 kGy | Sealed air-100 kGy | Control | Open air-25 kGy | Sealed argon-25 kGy | Sealed air-100 kGy |
| Replicates                                  |         |                 |                     |                    |         |                 |                     |                    |
| 1                                           | 3.00    | 5.44            | 4.87                | 4.85               | 7.78    | 3.53            | 2.79                | 8.85               |
| 2                                           | 4.21    | 6.53            | 6.31                | 6.01               | 8.12    | 5.08            | 3.15                | 4.97               |

S-Table 6. Hydrostatic pressure Testing for Proxima Gowns

| Hydrostatic pressure Testing for Proxima Gowns |         |         |         |
|------------------------------------------------|---------|---------|---------|
| Condition (ppm-min)                            | Control | 100 kGy | 200 kGy |
| Replicates                                     |         |         |         |
| 1                                              | 1.191   | 0.796   | 0.923   |
| 2                                              | 1.267   | 1.078   | 0.553   |
| 3                                              | 1.182   | 1.159   | 1.128   |

S-Table 7. Water Impact Penetration Testing for Proxima Gowns

| Water Impact Penetration Testing for Proxima Gowns |         |         |         |
|----------------------------------------------------|---------|---------|---------|
| Condition (ppm-min)                                | Control | 100 kGy | 200 kGy |
| Replicates                                         |         |         |         |
| 1                                                  | 0.05    | 0.72    | 0.87    |

S-Table 8. Mechanical Testing for 3M N95 Respirators

| Inner Layer                |                            |             |             |             |
|----------------------------|----------------------------|-------------|-------------|-------------|
| Condition (ppm-min)        | Force at Break [N]         |             |             |             |
|                            | Replicate-1                | Replicate-2 | Replicate-3 | Replicate-4 |
| Control-0                  | 23                         | 20.5        | 18.1        | 20.8        |
| Open air-25 kGy            | 31.7                       | 14.2        | 24.6        | 10.3        |
| Sealed argon-25 kGy        | 13.1                       | 16.4        | 18.3        | 18.7        |
| Sealed air-100 kGy         | 20.2                       | 17.5        | 27.8        | 15.1        |
| Displacement at Break [mm] |                            |             |             |             |
| Condition (ppm-min)        | Displacement at Break [mm] |             |             |             |
|                            | Replicate-1                | Replicate-2 | Replicate-3 | Replicate-4 |
| Control-0                  | 3.7                        | 4.6         | 5.4         | 4.8         |

|                     |                            |             |             |             |
|---------------------|----------------------------|-------------|-------------|-------------|
| Open air-25 kGy     | 4.1                        | 2.1         | 2.6         | 2.3         |
| Sealed argon-25 kGy | 3.4                        | 3.4         | 2.9         | 5.3         |
| Sealed air-100 kGy  | 2.7                        | 3.5         | 3.2         | 2.0         |
|                     | Elongation at break [%]    |             |             |             |
|                     | Replicate-1                | Replicate-2 | Replicate-3 | Replicate-4 |
| Control-0           | 11.5                       | 14.2        | 16.7        | 14.7        |
| Open air-25 kGy     | 12.5                       | 6.4         | 8.1         | 7.0         |
| Sealed argon-25 kGy | 10.6                       | 10.6        | 9.0         | 16.2        |
| Sealed air-100 kGy  | 8.4                        | 10.8        | 9.9         | 6.3         |
|                     | Middle Layer               |             |             |             |
| Condition (ppm-min) | Force at Break [N]         |             |             |             |
|                     | Replicate-1                | Replicate-2 | Replicate-3 | Replicate-4 |
| Control-0           | 4.1                        | 3.8         | 3.8         | 3.8         |
| Open air-25 kGy     | 3.1                        | 2.6         | 2.7         | 2.5         |
| Sealed argon-25 kGy | 4                          | 3.4         | 3.3         | 3.5         |
| Sealed air-100 kGy  | 0.8                        | 0.7         | 0.6         | 0.5         |
|                     | Displacement at Break [mm] |             |             |             |
|                     | Replicate-1                | Replicate-2 | Replicate-3 | Replicate-4 |
| Control-0           | 2.1                        | 2.3         | 2.6         | 2.8         |
| Open air-25 kGy     | 2.6                        | 2.1         | 1.8         | 2.3         |
| Sealed argon-25 kGy | 1.4                        | 1.8         | 1.6         | 1.9         |
| Sealed air-100 kGy  | 0.4                        | 0.3         | 0.4         | 0.3         |
|                     | Elongation at break [%]    |             |             |             |
|                     | Replicate-1                | Replicate-2 | Replicate-3 | Replicate-4 |
| Control-0           | 6.5                        | 7.0         | 8.0         | 8.5         |
| Open air-25 kGy     | 8.0                        | 6.5         | 5.4         | 7.0         |
| Sealed argon-25 kGy | 4.4                        | 5.4         | 4.9         | 5.9         |
| Sealed air-100 kGy  | 1.3                        | 0.8         | 1.3         | 0.8         |
|                     | Outer Layer                |             |             |             |
| Condition (ppm-min) | Force at Break [N]         |             |             |             |
|                     | Replicate-1                | Replicate-2 | Replicate-3 | Replicate-4 |
| Control-0           | 11.9                       | 18.6        | 21.9        | 16.8        |
| Open air-25 kGy     | 18.6                       | 16          | 19          | 10.2        |
| Sealed argon-25 kGy | 15.7                       | 15          | 17.4        | 13.8        |
| Sealed air-100 kGy  | 19.1                       | 12.3        | 13.2        | 14.5        |
|                     | Displacement at Break [mm] |             |             |             |
|                     | Replicate-1                | Replicate-2 | Replicate-3 | Replicate-4 |
| Control-0           | 1.9                        | 3.6         | 3.2         | 2.1         |
| Open air-25 kGy     | 2.7                        | 3.1         | 3.5         | 1.8         |

|                     |                                                                                                              |             |             |             |
|---------------------|--------------------------------------------------------------------------------------------------------------|-------------|-------------|-------------|
| Sealed argon-25 kGy | 2.8                                                                                                          | 2.4         | 2.9         | 3.4         |
| Sealed air-100 kGy  | 2.9                                                                                                          | 1.9         | 2.1         | 3.3         |
|                     | Elongation at break [%]                                                                                      |             |             |             |
|                     | Replicate-1                                                                                                  | Replicate-2 | Replicate-3 | Replicate-4 |
| Control-0           | 5.9                                                                                                          | 11.0        | 9.9         | 6.4         |
| Open air-25 kGy     | 8.3                                                                                                          | 9.5         | 10.9        | 5.4         |
| Sealed argon-25 kGy | 8.5                                                                                                          | 7.5         | 9.0         | 10.6        |
| Sealed air-100 kGy  | 8.8                                                                                                          | 5.9         | 6.5         | 10.1        |
|                     | Elastomer Band                                                                                               |             |             |             |
| Condition (ppm-min) | Force at Break [N]                                                                                           |             |             |             |
|                     | Replicate-1                                                                                                  | Replicate-2 | Replicate-3 | Replicate-4 |
| Control-0           | 7.8                                                                                                          | 8.2         | 5.1         | 4.5         |
| Open air-25 kGy     | 5.5                                                                                                          | 4.6         | 4.5         | 5.3         |
| Sealed argon-25 kGy | 10.9                                                                                                         | 5.8         | 4.8         | 14.1        |
| Sealed air-100 kGy  | 15.0                                                                                                         | 13.8        | 14.9        | 14.6        |
|                     | Displacement at Break [mm]                                                                                   |             |             |             |
|                     | Replicate-1                                                                                                  | Replicate-2 | Replicate-3 | Replicate-4 |
| Control-0           | 461.1                                                                                                        | 432.9       | 322.6       | 271.3       |
| Open air-25 kGy     | 335.4                                                                                                        | 275.2       | 258.5       | 303.4       |
| Sealed argon-25 kGy | 550.8                                                                                                        | 331.6       | 279.0       | 629.0       |
| Sealed air-100 kGy  | 686.7                                                                                                        | 638.0       | 657.2       | 676.5       |
|                     | Elongation at break [%]                                                                                      |             |             |             |
|                     | Replicate-1                                                                                                  | Replicate-2 | Replicate-3 | Replicate-4 |
| Control-0           | 461.1                                                                                                        | 432.9       | 322.6       | 271.3       |
| Open air-25 kGy     | 335.4                                                                                                        | 275.2       | 258.5       | 303.4       |
| Sealed argon-25 kGy | 550.8                                                                                                        | 331.6       | 279.0       | 629.0       |
| Sealed air-100 kGy  | 686.7                                                                                                        | 638.0       | 657.2       | 676.5       |
|                     | Note:<br>Distance between grips = 32.5 mm<br>Apparent elongation: (displacement/distance between grips) *100 |             |             |             |

S-Table 9. Mechanical Testing for Proxima Gowns

| 3M N95 Respirators |                    |      |      |
|--------------------|--------------------|------|------|
| Condition (kGy)    | Force at Break [N] |      |      |
| Control-0          | 34                 | 31.4 | 32.8 |
| 25                 | 21.4               | 23.8 | 26.1 |
| 50                 | 21.4               | 21.5 | 24.7 |
| 75                 | 17.8               | 18.3 | 17.3 |
| 100                | 11.7               | 10.2 | 11.7 |
| 200                | 9.2                | 8.3  | 9.1  |

|                                                                                                         | Displacement at Break [mm] |      |      |
|---------------------------------------------------------------------------------------------------------|----------------------------|------|------|
| Control-0                                                                                               | 24.8                       | 25.8 | 24.3 |
| 25                                                                                                      | 13.3                       | 16.3 | 16.8 |
| 50                                                                                                      | 13.8                       | 12.8 | 15.3 |
| 75                                                                                                      | 7.8                        | 8.8  | 8.8  |
| 100                                                                                                     | 2.7                        | 2.8  | 3.3  |
| 200                                                                                                     | 2.3                        | 1.8  | 2.8  |
|                                                                                                         | Elongation at Break [%]    |      |      |
| Control-0                                                                                               | 24.8                       | 25.8 | 24.3 |
| 25                                                                                                      | 13.3                       | 16.3 | 16.8 |
| 50                                                                                                      | 13.8                       | 12.8 | 15.3 |
| 75                                                                                                      | 7.8                        | 8.8  | 8.8  |
| 100                                                                                                     | 2.7                        | 2.8  | 3.3  |
| 200                                                                                                     | 2.3                        | 1.8  | 2.8  |
| Note: Distance between grips = 100mm<br>Apparent elongation: (displacement/distance between grips) *100 |                            |      |      |
